# Supplementary material for: NLRX1 is a key regulator of immune signaling during invasive pulmonary aspergillosis
Source: PubMed Central journal article supplement (PMC7529209; doi:10.1371/journal.ppat.1008854), 2020-09-21

## A CD45+ Gating Strategy

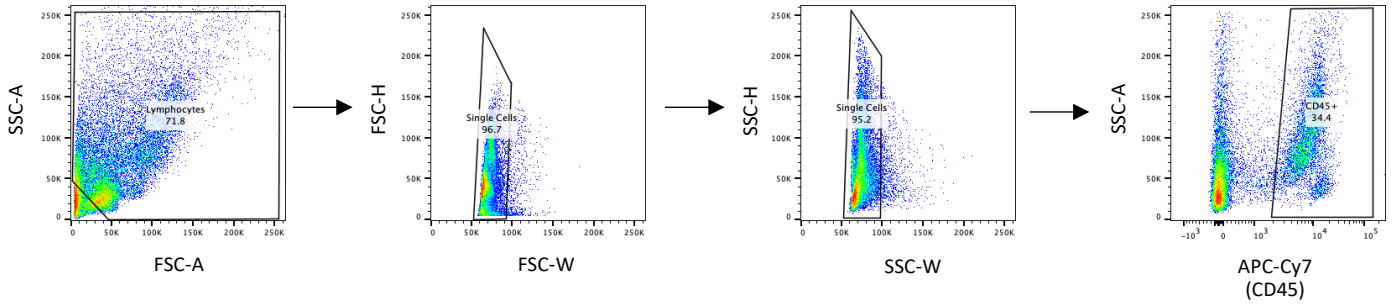

## B Panel 1 Gating Strategy

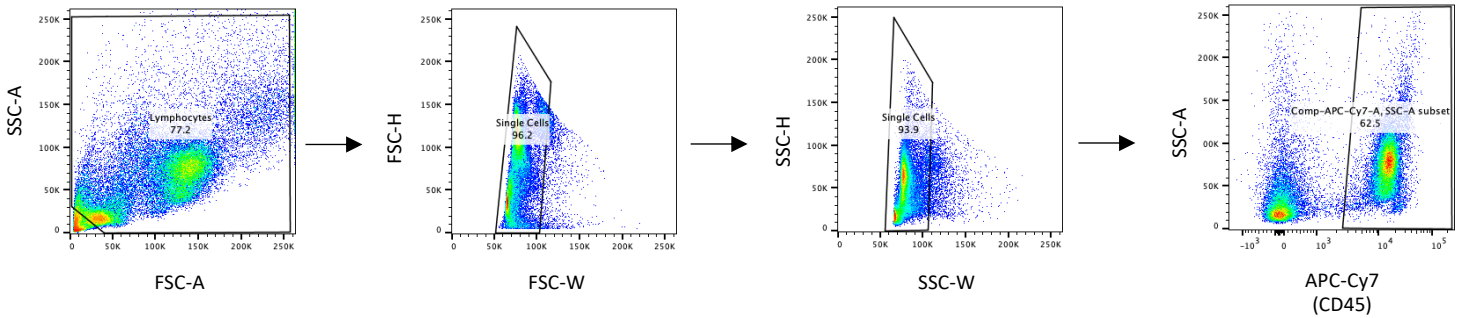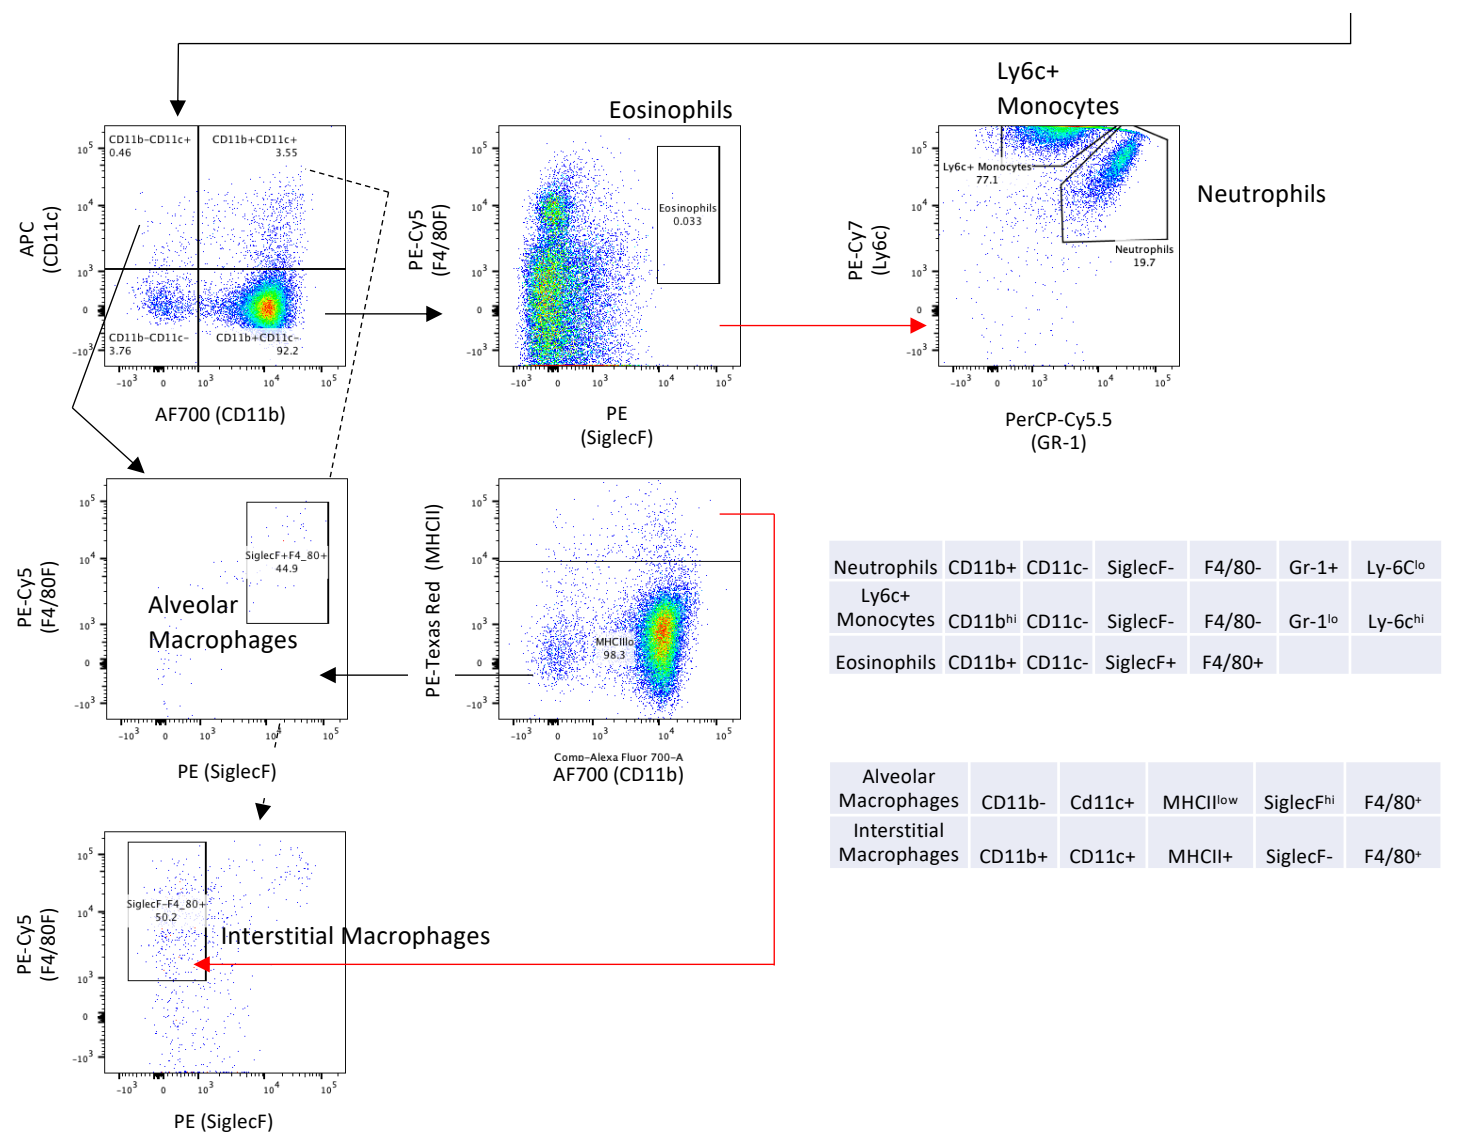

# C Panel 2 Gating Strategy

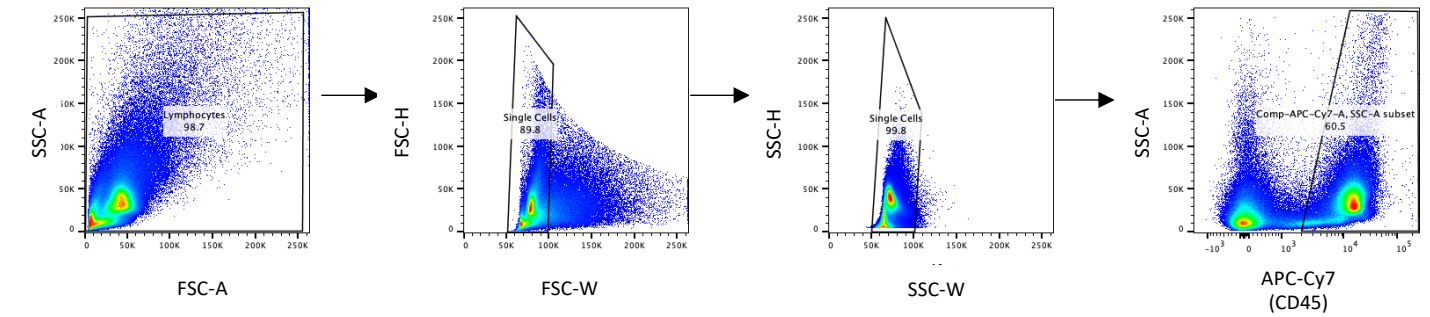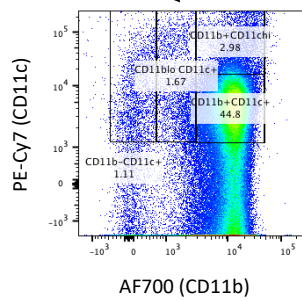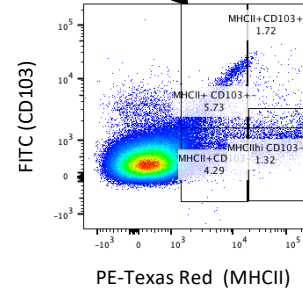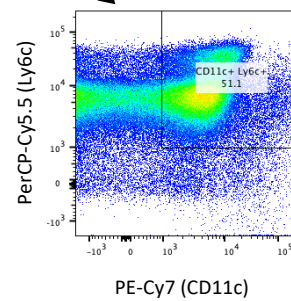

|        |         |         |         |       |        |
|--------|---------|---------|---------|-------|--------|
| pDC    | CD11blo | CD11c+  | MHCII+  | Ly6c+ |        |
| mDC    | CD11b+  | CD11c+  | MHCIIhi | Ly6c+ | CD103- |
| cDC    | CD11b+  | CD11chi | MHCII+  |       | CD103- |
| CD103+ | CD11b-  | CD11c+  | MHCII+  |       | CD103+ |

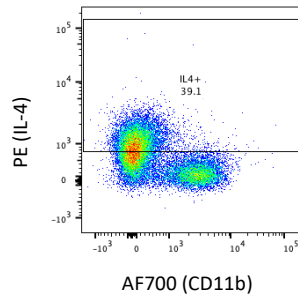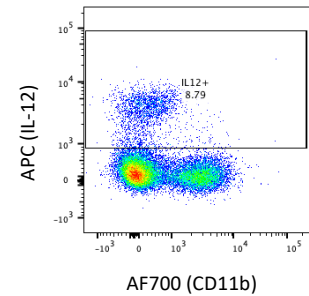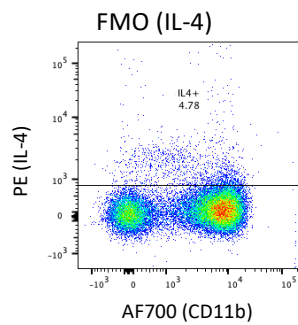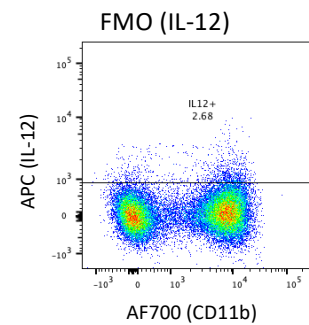

# D Panel 3 Gating Strategy

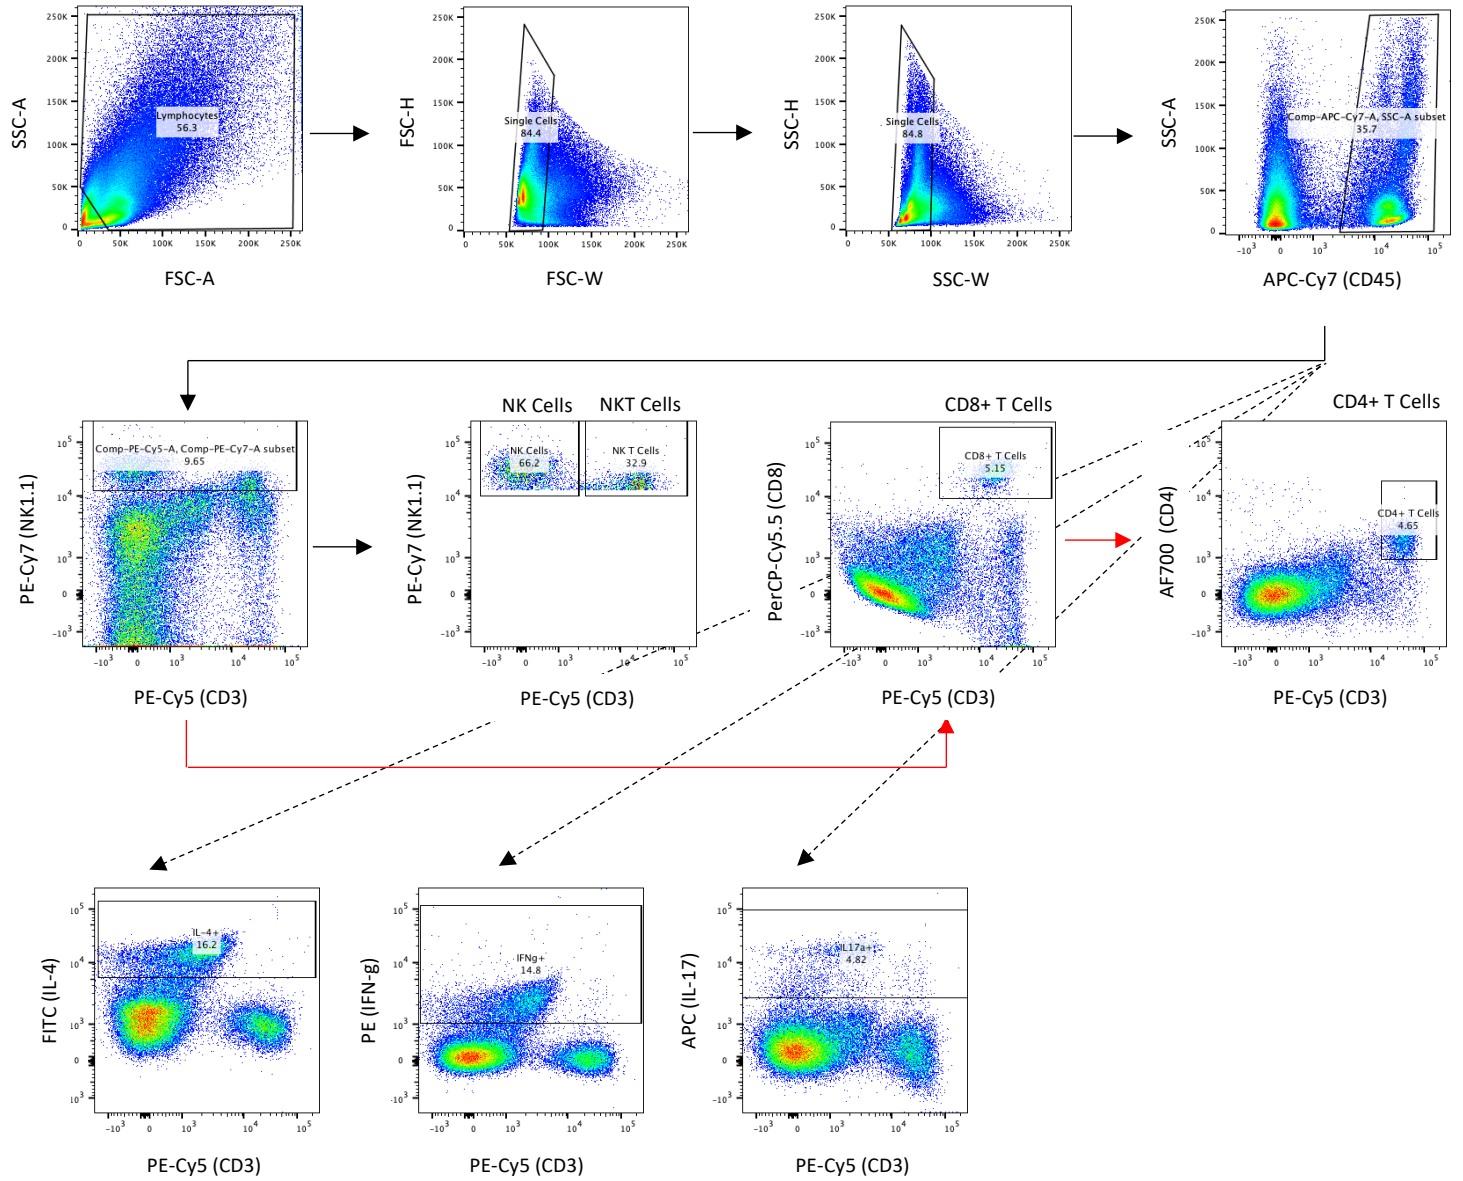

Supplement: ppat.1008854.s002.pdf [file ppat.1008854.s002.pdf]
